# Supplementary material for: Advanced non-cardia gastric cancer and Helicobacter pylori infection in Vietnam
Source: Springer Nature journal article supplement (doi:10.1186/s13099-017-0195-8), 2017-08-17
Supplement: MOESM1 [file 14222710]

## **Nucleotide sequence of full-length *cagA* and phylogenetic analysis**

The full-length *cagA* sequences were determined as described previously [1]. For phylogenetic analysis of *cagA* sequences, 14 East-Asian-type *cagA* strains from gastric cancer (GC) patients and 14 East-Asian-type *cagA* strains from gastritis patients were randomly selected (**Table S1**) with Genbank accession numbers from LC314739 to LC314766; the other strains from surrounding countries such as Thailand, Cambodia, Philippines, China, Japan (mainland and Okinawa prefecture), and several Western countries were also obtained from GenBank as reference sequences. The GenBank accession numbers are as follows: Thailand, GU173873–GU173875, GU173877–GU173879; Cambodia, JF798688–JF798692, JF798698–JF798706; the Philippines, GU173858–GU173861, GU173864–GU173867, GU173869–GU173872; China, AF249275, AF367250, EU681369; Japan (mainland), AB090075, AB190964, AB190935, AB017921–AB017923, AB015411, AB015412; Japan (Okinawa), AB190937, AB190940–AB190943, AB190946–AB190948, AB190950, AB190951, AB190954, AB190956, AB190968, AB246735, AB246737; and Western countries, 26695, ATCC49503-W, ATCC43579-W, ATCC43526-W, NCTC11637-Australia. The full-length *cagA* sequences of strains from GC patients and reference sequences were aligned using CLUSTALW program in MEGA 6.0 software (Molecular Evolutionary Genetics Analysis, Tempe, AZ, USA). Phylogenetic tree was constructed using the neighbor-joining method, and bootstrap test (1,000) for phylogeny was performed using MEGA 6.0.

### **Figure legend for Figure S1**

The phylogenetic tree of *cagA* full-length sequences showed that the strains isolated from GC and chronic gastritis in Vietnam were scattered into the same branch like the other East-Asian- *cagA* strains.

**Table S1 Strains isolated from 14 gastric cancer vs 14 gastritis**

| Strains<br>(n=28) | Diseases          | EPIYA<br>Segment<br>type | full-length<br><i>cagA</i> (bp) | Protein<br>(aa) | Homology<br>with<br>East-Asian<br>type strain<br>F32 (%) | Homology<br>with Western<br>type strain<br>26695 (%) |
|-------------------|-------------------|--------------------------|---------------------------------|-----------------|----------------------------------------------------------|------------------------------------------------------|
| CHC06             | Gastric<br>cancer | ABD                      | 3546                            | 1182            | 94.3                                                     | 86.6                                                 |
| CHC38             |                   | ABD                      | 3546                            | 1182            | 94.4                                                     | 86.3                                                 |
| CHC40             |                   | ABD                      | 3546                            | 1182            | 94.7                                                     | 86.1                                                 |
| CHC62             |                   | ABD                      | 3531                            | 1177            | 95.9                                                     | 86.5                                                 |
| CHC65             |                   | ABD                      | 3546                            | 1182            | 94.7                                                     | 86.5                                                 |
| CHC66             |                   | ABD                      | 3549                            | 1183            | 94.6                                                     | 86.7                                                 |
| CHC68             |                   | ABD                      | 3531                            | 1177            | 95.0                                                     | 86.5                                                 |
| CHC74             |                   | ABD                      | 3555                            | 1185            | 95.2                                                     | 86.9                                                 |
| CHC77             |                   | ABD                      | 3546                            | 1182            | 94.7                                                     | 86.6                                                 |
| CHN08             |                   | ABD                      | 3549                            | 1183            | 95.3                                                     | 86.0                                                 |
| CHN12             |                   | ABD                      | 3543                            | 1181            | 94.4                                                     | 86.3                                                 |
| CHN20             |                   | ABD                      | 3543                            | 1181            | 94.3                                                     | 86.1                                                 |
| CHN22             |                   | ABD                      | 3585                            | 1195            | 95.0                                                     | 86.6                                                 |
| CHN36             |                   | ABD                      | 3528                            | 1176            | 96.4                                                     | 86.3                                                 |
| HC029             | Gastritis         | ABD                      | 3543                            | 1181            | 94.6                                                     | 86.0                                                 |
| HC034             |                   | ABD                      | 3537                            | 1179            | 95.9                                                     | 86.0                                                 |
| HC038             |                   | ABD                      | 3540                            | 1180            | 95.3                                                     | 86.7                                                 |
| HC061             |                   | ABD                      | 3528                            | 1176            | 94.2                                                     | 86.8                                                 |
| HC093             |                   | ABD                      | 3546                            | 1182            | 94.9                                                     | 86.4                                                 |
| HC124             |                   | ABD                      | 3603                            | 1201            | 92.5                                                     | 85.4                                                 |
| HC132             |                   | ABD                      | 3528                            | 1176            | 95.2                                                     | 85.9                                                 |
| HC150             |                   | ABD                      | 3543                            | 1181            | 94.9                                                     | 86.4                                                 |
| HN021             |                   | ABD                      | 3546                            | 1182            | 94.7                                                     | 86.1                                                 |
| HN031             |                   | ABD                      | 3552                            | 1184            | 94.5                                                     | 86.5                                                 |
| HN073             |                   | ABD                      | 3552                            | 1184            | 95.0                                                     | 86.6                                                 |
| HN111             |                   | ABD                      | 3546                            | 1182            | 94.9                                                     | 86.3                                                 |
| VH010             |                   | ABD                      | 3543                            | 1181            | 94.7                                                     | 86.2                                                 |
| VH133             |                   | ABD                      | 3546                            | 1182            | 94.6                                                     | 86.3                                                 |



## Reference

1. Cortes MC, Yamakawa A, Casingal CR, Fajardo LS, Juan ML, De Guzman BB, Bondoc EM, St. Luke's Helicobacter pylori Study G, Mahachai V, Yamazaki Y, Yoshida M, Kutsumi H, Natividad FF, Azuma T. Diversity of the *cagA* gene of *Helicobacter pylori* strains from patients with gastroduodenal diseases in the Philippines. *FEMS Immunol Med Microbiol.* 2010; 60:90-97. doi: 10.1111/j.1574-695X.2010.00722.x
